# Supplementary material for: Re-identification of Colletotrichum acutatum Species Complex in Korea and Their Host Plants
Source: PubMed Central journal article supplement — Plant Pathol J. 2023 Aug 1;39(4):384–96. doi: 10.5423/PPJ.OA.05.2023.0078 (PMC10412970; doi:10.5423/ppj.oa.05.2023.0078), 2023-08-01
Supplement: PPJ-OA-05-2023-0078-Supplementary-Table-1.pdf [file PPJ-OA-05-2023-0078-Supplementary-Table-1.pdf]

**Supplementary Table 1.** Reference sequences used in the phylogenetic analysis

| Species name           | Culture                       | Host                             | Country      | GenBank accession no. |          |          |          |          |          |
|------------------------|-------------------------------|----------------------------------|--------------|-----------------------|----------|----------|----------|----------|----------|
|                        |                               |                                  |              | ITS                   | TUB2     | GAPDH    | HIS3     | CHS-1    | ACT      |
| <i>C. abscissum</i>    | CDA918*<br>= COAD 1877        | <i>Citrus sinensis</i>           | Brazil       | KP843126              | KP843135 | KP843129 | KP843138 | KP843132 | KP843141 |
| <i>C. acerbum</i>      | CBS 128530*<br>= PRJ 1199.3   | <i>Malus domestica</i>           | New Zealand  | JQ948459              | JQ950110 | JQ948790 | JQ949450 | JQ949120 | JQ949780 |
| <i>C. acutatum</i>     | CBS 112996*<br>= STE-U 5292   | <i>Carica papaya</i>             | Australia    | JQ005776              | JQ005860 | JQ948677 | JQ005818 | JQ005797 | JQ005839 |
| <i>C. arboricola</i>   | SAG 53350-12*<br>= CBS 144795 | <i>Fuchsia magellanica</i>       | Chile        | MH817944              | MH817962 | MH817950 | -        | -        | MH817956 |
| <i>C. australe</i>     | CBS 116478*<br>= HKUCC 2616   | <i>Trachycarpus fortunei</i>     | South Africa | JQ948455              | JQ950106 | JQ948786 | JQ949446 | JQ949116 | JQ949776 |
| <i>C. brisbanense</i>  | CBS 292.67*<br>= DPI 11711    | <i>Capsicum annuum</i>           | Australia    | JQ948291              | JQ949942 | JQ948621 | JQ949282 | JQ948952 | JQ949612 |
| <i>C. cairnsense</i>   | BRIP 63642*<br>= CBS 140847   | <i>Capsicum annuum</i>           | Australia    | KU923672              | KU923688 | KU923704 | KU923722 | KU923710 | KU923716 |
| <i>C. carthami</i>     | SAPA 100011*                  | <i>Carthamus tinctorium</i>      | Japan        | AB696998              | AB696992 | -        | -        | -        | -        |
| <i>C. chrysanthemi</i> | IMI 364540<br>= CPC 18930     | <i>Chrysanthemum coronarium</i>  | China        | JQ948273              | JQ949924 | JQ948603 | JQ949264 | JQ948934 | JQ949594 |
| <i>C. cosmi</i>        | CBS 853.73*                   | <i>Cosmos</i> sp.                | Netherlands  | JQ948274              | JQ949925 | JQ948604 | JQ949265 | JQ948935 | JQ949595 |
| <i>C. costaricense</i> | CBS 330.75*                   | <i>Coffea arabica</i>            | Costa Rica   | JQ948180              | JQ949831 | JQ948510 | JQ949171 | JQ948841 | JQ949501 |
| <i>C. cuscutae</i>     | IMI 304802*<br>= CPC 18873    | <i>Cuscuta</i> sp.               | Dominica     | JQ948195              | JQ949846 | JQ948525 | JQ949186 | JQ948856 | JQ949516 |
| <i>C. eriobotryae</i>  | Cer001*<br>= GLMC 1935        | <i>Eriobotrya japonica</i>       | Taiwan       | MF772487              | MF795428 | MF795423 | MN191658 | MN191653 | MN191648 |
| <i>C. fioriniae</i>    | CBS 128517*<br>= EHS 58       | <i>Fiorinia externa</i> (insect) | USA          | JQ948292              | JQ949943 | JQ948622 | JQ949283 | JQ948953 | JQ949613 |
| <i>C. godetiae</i>     | CBS 133.44*                   | <i>Clarkia hybrida</i> ,         | Denmark      | JQ948402              | JQ950053 | JQ948733 | JQ949393 | JQ949063 | JQ949723 |
| <i>C. guajavae</i>     | IMI 350839*<br>= CPC 18893    | <i>Psidium guajava</i>           | India        | JQ948270              | JQ949921 | JQ948600 | JQ949261 | JQ948931 | JQ949591 |
| <i>C. indonesiense</i> | CBS 127551*<br>= CPC 14986    | <i>Eucalyptus</i> sp.            | Indonesia    | JQ948288              | JQ949939 | JQ948618 | JQ949279 | JQ948949 | JQ949609 |
| <i>C. javanense</i>    | CBS 144963*                   | <i>Capsicum annuum</i>           | Indonesia    | MH846576              | MH846574 | MH846572 | MH846571 | MH846573 | MH846575 |
| <i>C. johnstonii</i>   | CBS 128532*<br>= PRJ 1139.3   | <i>Solanum lycopersicum</i>      | New Zealand  | JQ948444              | JQ950095 | JQ948775 | JQ949435 | JQ949105 | JQ949765 |
| <i>C. kinghornii</i>   | CBS 198.35*                   | <i>Phormium</i> sp.              | UK           | JQ948454              | JQ950105 | JQ948785 | JQ949445 | JQ949115 | JQ949775 |

(Continued)

Supplementary Table 1. Continued

| Species name            | Culture                       | Host                       | Country     | GenBank accession no. |          |          |          |          |          |
|-------------------------|-------------------------------|----------------------------|-------------|-----------------------|----------|----------|----------|----------|----------|
|                         |                               |                            |             | ITS                   | TUB2     | GAPDH    | HIS3     | CHS-1    | ACT      |
| <i>C. kniphofiae</i>    | CBS 143496*                   | <i>Kniphofia uvaria</i>    | UK          | MH107884              | MH108037 | MH107998 | -        | MH107990 | MH107975 |
| <i>C. laticiphilum</i>  | CBS 112989*<br>= STE-U 5303   | <i>Hevea brasiliensis</i>  | India       | JQ948289              | JQ949940 | JQ948619 | JQ949280 | JQ948950 | JQ949610 |
| <i>C. lauri</i>         | IT2505_1a*<br>= MFLUCC17-0205 | <i>Laurus nobilis</i>      | Italy       | KY514347              | KY514350 | KY514344 | -        | KY514341 | KY514338 |
| <i>C. limetticola</i>   | CBS 114.14*                   | <i>Citrus aurantifolia</i> | USA         | JQ948193              | JQ949844 | JQ948523 | JQ949184 | JQ948854 | JQ949514 |
| <i>C. lupini</i>        | CBS 109225*<br>= BBA 70884    | <i>Lupinus albus</i>       | Ukraine     | JQ948155              | JQ949806 | JQ948485 | JQ949146 | JQ948816 | JQ949476 |
| <i>C. melonis</i>       | CBS 159.84*                   | <i>Cucumis melo</i>        | Brazil      | JQ948194              | JQ949845 | JQ948524 | JQ949185 | JQ948855 | JQ949515 |
| <i>C. miaoliense</i>    | ML1040*<br>= NTUCC 20-001-1   | <i>Fragaria × ananassa</i> | Taiwan      | MK908419              | MK908624 | MK908470 | -        | MK908522 | MK908573 |
| <i>C. nymphaeae</i>     | CBS 515.78*                   | <i>Nymphaea alba</i>       | Netherlands | JQ948197              | JQ949848 | JQ948527 | JQ949188 | JQ948858 | JQ949518 |
| <i>C. orchidophilum</i> | CBS 632.80*                   | <i>Dendrobium</i> sp.      | USA         | JQ948151              | JQ949802 | JQ948481 | JQ949142 | JQ948812 | JQ949472 |
| <i>C. paranaense</i>    | CPC 20901*<br>= CBS 134729    | <i>Malus domestica</i>     | Parana      | KC204992              | KC205060 | KC205026 | KC205004 | KC205043 | KC205077 |
| <i>C. paxtonii</i>      | IMI 165753*<br>= CPC 18868    | <i>Musa</i> sp.            | Saint Lucia | JQ948285              | JQ949936 | JQ948615 | JQ949276 | JQ948946 | JQ949606 |
| <i>C. phormii</i>       | CBS 118194*<br>= AR 3546      | <i>Phormium</i> sp.        | Germany     | JQ948446              | JQ950097 | JQ948777 | JQ949437 | JQ949107 | JQ949767 |
| <i>C. pyricola</i>      | CBS 128531*<br>= PRJ 977.1    | <i>Pyrus communis</i>      | New Zealand | JQ948445              | JQ950096 | JQ948776 | JQ949436 | JQ949106 | JQ949766 |
| <i>C. rhombiforme</i>   | CBS 129953*<br>= RB011        | <i>Olea europaea</i>       | Portugal    | JQ948457              | JQ950108 | JQ948788 | JQ949448 | JQ949118 | JQ949778 |
| <i>C. roseum</i>        | CBS 145754*                   | <i>Lapageria rosea</i>     | Chile       | MK903611              | MK903607 | MK903603 | -        | -        | MK903604 |
| <i>C. salicis</i>       | CBS 607.94*                   | <i>Salix</i> sp.           | Netherlands | JQ948460              | JQ950111 | JQ948791 | JQ949451 | JQ949121 | JQ949781 |
| <i>C. scovillei</i>     | CBS 126529*<br>= BBA 70349    | <i>Capsicum</i> sp.        | Indonesia   | JQ948267              | JQ949918 | JQ948597 | JQ949258 | JQ948928 | JQ949588 |
| <i>C. simmondsii</i>    | CBS 122122*<br>= BRIP 28519   | <i>Carica papaya</i>       | Australia   | JQ948276              | JQ949927 | JQ948606 | JQ949267 | JQ948937 | JQ949597 |
| <i>C. sloanei</i>       | IMI 364297*<br>= CPC 18929    | <i>Theobroma cacao</i>     | Malaysia    | JQ948287              | JQ949938 | JQ948617 | JQ949278 | JQ948948 | JQ949608 |
| <i>C. subsalicis</i>    | CQ1168*                       | <i>Populus alba</i>        | China       | MZ852849              | MZ673953 | MZ664104 | MZ673836 | MZ799346 | MZ664128 |

(Continued)

**Supplementary Table 1.** Continued

| Species name          | Culture                      | Host                      | Country  | GenBank accession no. |          |          |          |          |          |
|-----------------------|------------------------------|---------------------------|----------|-----------------------|----------|----------|----------|----------|----------|
|                       |                              |                           |          | ITS                   | TUB2     | GAPDH    | HIS3     | CHS-1    | ACT      |
| <i>C. tamarilloi</i>  | CBS 129814*<br>= T.A.6       | <i>Solanum betaceum</i>   | Colombia | JQ948184              | JQ949835 | JQ948514 | JQ949175 | JQ948845 | JQ949505 |
| <i>C. walleri</i>     | CBS 125472*<br>= BMT(HL)19   | <i>Coffea</i> sp.         | Vietnam  | JQ948275              | JQ949926 | JQ948605 | JQ949266 | JQ948936 | JQ949596 |
| <i>C. wanningense</i> | Hainan14*<br>= CGMCC 3.18936 | <i>Hevea brasiliensis</i> | China    | MG830462              | MG830286 | MG830318 | -        | MG830302 | MG830270 |
| <i>C. schimae</i>     | NN046984*                    | <i>Schima</i> sp.         | China    | MZ595885              | MZ674003 | MZ664105 | MZ673905 | MZ799347 | MZ664183 |

Asterisk (\*) indicates ex-type strains.

ITS, internal transcribed spacer; TUB2,  $\beta$ -tubulin 2; GAPDH, glyceraldehyde-3-phosphate chydrogenase; HIS3, histone3; CHS-1, chitin synthase; ACT, actin.
